# Supplementary material
Source: publisher figshare collection journal article supplement (https://karger.figshare.com/ndownloader/files/26763344)
Supplement: Supplementary file 1 [file 26763344]

**Supplementary Fig. 1.** Variability of the histology during gonadal development in *A. mexicanus.* This variability in gonadal development is observed at early stages i.e., 30 dpf (A-B), with mainly differences in gonad sizes between animals. At 65 dpf (C-D), the variability is more visible since some ovaries are already differentiated (C) with the presence of oogonia (Oog) and previtellogenic oocytes (PVtg Ooc), while others (D) did not show any morphological differentiation signs with gonads mainly containing somatic cells (Sc). At 90 dpf (E-F), we even found differences within the same animal with a left gonad with PVtg Ooc of different sizes (F), whereas the right gonad (E) is formed mainly by few germ cells (Gc) and surrounding Scs. Scale bars for panels A-B correspond to 20 µm and 10 µm for panel C-F. Mu: Muscle; N: Nucleus; Nu: Nucleolus.
